# Supplementary material for: Identical Substitutions in Magnesium Chelatase Paralogs Result in Chlorophyll-Deficient Soybean Mutants
Source: PubMed Central journal article supplement (PMC4291463; doi:10.1534/g3.114.015255), 2014-12-01
Supplement: supp_g3.114.015255_015255SI.pdf [file supp_g3.114.015255_015255SI.pdf]

## Identical substitutions in magnesium chelatase paralogs result in chlorophyll deficient soybean mutants

Benjamin W. Campbell\*, Dhananjay Mani\*, Shaun J. Curtin\*, Rebecca A. Slattery<sup>§</sup>, Jean-Michel Michno\*, Donald R. Ort<sup>§,†</sup>, Philip J. Schaus\*, Reid G. Palmer<sup>‡</sup>, James H. Orf\*, Robert M. Stupar\*

\*Department of Agronomy and Plant Genetics, University of Minnesota, St. Paul, MN 55108, U.S.A., <sup>§</sup>Department of Plant Biology, University of Illinois, Urbana, IL 61801, U.S.A.,

<sup>†</sup>U.S. Department of Agriculture/Agricultural Research Service, Global Change and Photosynthesis Research Unit, Urbana, IL 61801, U.S.A., <sup>‡</sup>Department of Agronomy, Iowa State University, Ames, IA, 50011, U.S.A.

### Corresponding Author:

Robert M. Stupar  
Department of Agronomy & Plant Genetics  
University of Minnesota  
1991 Upper Buford Circle  
411 Borlaug Hall  
St. Paul, MN 55108  
Phone: +1-612-625-5769  
Email: stup0004@umn.edu

DOI: [10.1534/g3.114.015255](https://doi.org/10.1534/g3.114.015255)

**Table S1 Primer sequences for Sequenom MassARRAY assays used for the first round of fine-mapping for the MinnGold mutation.**

| SNP_ID            | 2nd-PCR                         | 1st-PCR                            | UEP_SEQ                      |
|-------------------|---------------------------------|------------------------------------|------------------------------|
| Gm13_19279455_A_G | ACGTTGGATGTGAACATTGCCTGCTAAGCG  | ACGTTGGATGTTTTGGGCTTGGTGTGAAG      | ccccCCAATTAGATCTGCAGAAC      |
| Gm13_23724744_A_G | ACGTTGGATGACGTTTCACCCATGAACACC  | ACGTTGGATGCTAGTACTCGGATATTCAGC     | ccTCCACTCACCAGTATCA          |
| Gm13_24148253_C_T | ACGTTGGATGCATGACATGTTGAGCCAACC  | ACGTTGGATGTGATTGGTTGCGCATGTGAC     | TGAGCCAACCTAGTCAT            |
| Gm13_25508582_A_G | ACGTTGGATGCGTCTAGACTCTTTCTGTTC  | ACGTTGGATGTATGTAAGTACTGACCTCTCATGC | TGCTTGTATCTCATAGAGATAAATAAAC |
| Gm13_25737735_G_A | ACGTTGGATGGTATGGTTTGTATATTGTGG  | ACGTTGGATGTATACTCCAGCGAAGTCCC      | acatgTTGTATATTGTGGACCAACC    |
| Gm13_26671230_A_G | ACGTTGGATGGGCATTTTGTGCTGCAGA    | ACGTTGGATGCCATTGGTCGATTGTACTGG     | TTTTGTGCTGCAGAAAATAAAT       |
| Gm13_27212330_G_A | ACGTTGGATGAGCAAAGCAGCACTTGCATC  | ACGTTGGATGCTTGTGAGAATATTTACAATCC   | ccccCGTGAACGTCCTCCGGGCAAA    |
| Gm13_27413980_G_A | ACGTTGGATGCTTTTTGATTGTTTTGTTG   | ACGTTGGATGTCAGCAATCTACTGCAGTTG     | TTTTAATTGTAAAGTTCAAAAACCTA   |
| Gm13_27781688_C_A | ACGTTGGATGCTATCTGCAATGATCTTTTC  | ACGTTGGATGACATTCTACATCGATCACGC     | TGCAATGATCTTTCAAGCCTA        |
| Gm13_28465103_C_T | ACGTTGGATGTTTACGTTGGTACCTCCGAA  | ACGTTGGATGTCGGCCCTCATATGATAAG      | gGGTACCTCCGAATAACTG          |
| Gm13_28812235_A_G | ACGTTGGATGCCGACTATCGTAGTGAGATG  | ACGTTGGATGCTTTTATGCCAACAAGTGGG     | GATGTTGATTGCTCTATGTCTAAA     |
| Gm13_29565413_G_A | ACGTTGGATGGCAGAACAACCTCATGTATCG | ACGTTGGATGAAGAGCTGATCCTAACTCCC     | ggatgACAATGCCAATCACTAAGAAAAA |
| Gm13_29946365_G_A | ACGTTGGATGTGTGGGTATGACCAATCTCC  | ACGTTGGATGGATCAATGGTATGTTTGTCC     | gcacTCTCCATTGTGAAACAACAAGG   |
| Gm13_30268845_G_A | ACGTTGGATGCGCCTTTGCGCACATCATC   | ACGTTGGATGGTATGGACTTGAGGAAATGG     | CACATCATCACCCGC              |
| Gm13_30581811_C_T | ACGTTGGATGTACACCGCTAGCTACTTCAC  | ACGTTGGATGACGACGGTTTTGGAGTTAGC     | CTAGCTACTTCACAGGTAA          |
| Gm13_31595360_C_T | ACGTTGGATGTTACGATGGTGTGCAAC     | ACGTTGGATGTCCTTGACACAACAACATCCG    | CAGTCCGAACGGTAG              |
| Gm13_32120834_T_C | ACGTTGGATGCTCCCAAAGTTTCCAATCGG  | ACGTTGGATGAGGGTTCACTCCAGACCTT      | CAAGCCATCGGTTTCC             |
| Gm13_33031727_T_C | ACGTTGGATGCAATGGAGCTTATTAAGAAGG | ACGTTGGATGTGACACAAGAAAGAAAATC      | GCTTATTAAGAAGGTATGCCAG       |
| Gm13_33302559_G_A | ACGTTGGATGAACGCGGTGTAATCATTGG   | ACGTTGGATGAGACAGCTTTTATCCCATCC     | gggagTGTGCCACGTGGTAAAAAG     |
| Gm13_33471044_G_A | ACGTTGGATGCAACAAGTGATCTCGACTCC  | ACGTTGGATGATTGCTGCTTTTATTATCCC     | ggtgACGAGTCAAAGCTAAAGAATAA   |
| Gm13_34624477_T_C | ACGTTGGATGTTGAGCAGCGGCTAAAAGAG  | ACGTTGGATGTGAAGGGCTTATGGAGATC      | gtgatCAGCGGCTAAAAGAGAGGCCA   |
| Gm13_34778592_C_T | ACGTTGGATGCGTACGTAATTTTAGGAGGC  | ACGTTGGATGTTGTTGCCGCTCTCATCAC      | ggatGAGGCGGTTTTTATCGACTG     |
| Gm13_35053712_C_A | ACGTTGGATGTCAGGAATTGGTAGGTCAGG  | ACGTTGGATGGAAAGTTGTGCATGGTGGTG     | gGGTCAGGCACAGTAAC            |
| Gm13_35188028_A_G | ACGTTGGATGAACACAACCGCTTTTCTCAC  | ACGTTGGATGAGTGTGTGAGGGAAGATTTCG    | ctcgTTTCTACAAGCATCTCTG       |
| Gm13_35492939_T_C | ACGTTGGATGAAAACCTAACCGCACACTG   | ACGTTGGATGGCAGATGGTTGGTATGAAAAG    | tcccGCTACGCACAACAAAAATAACCCA |
| Gm13_36007185_T_C | ACGTTGGATGCCTTGGCCAAACTTATCCTC  | ACGTTGGATGACTTGTCTCCTTACACCCAC     | ccctAGTCAACTCAACCTCAC        |
| Gm13_36188290_G_A | ACGTTGGATGGAGACACGTAGATGGAACAC  | ACGTTGGATGCCTGTTGCACATGTTCCAT      | ccctATGGAACACATTAACACAGCGAG  |
| Gm13_36252057_G_A | ACGTTGGATGATACAATTGAAAGCAGGGAC  |                                    | cGGGAGAAAGGGTATGG            |
| Gm13_36445455_T_C | ACGTTGGATGACTCTTCCCTCATGCTGATG  |                                    | ACCTTTAAGCTCATAGAGCAT        |
| Gm13_38030960_T_C | ACGTTGGATGCATCAGCATACCTTGAACAG  |                                    | ACAGAAAGACAAAGGTTATG         |

**Table S2 Primer sequences for Sequenom MassARRAY assays used for the second round of fine-mapping for the MinnGold mutation.**

| SNP_ID        | 2nd-PCR                         | 1st-PCR                         | UEP_SEQ                      |
|---------------|---------------------------------|---------------------------------|------------------------------|
| Gm13_32186965 | ACGTTGGATGACTGACTTTTTCCCTTTCG   | ACGTTGGATGCAGTGACGATAATTTTAAAGC | actagTTATACTCCCTGTCTCATTATGT |
| Gm13_32293065 | ACGTTGGATGGAGTCTATCCGTTTTATCAC  | ACGTTGGATGCGAGTTGCACGTACGAATAC  | gtctcTCCGTTTTATCACTTTTACTC   |
| Gm13_32316109 | ACGTTGGATGAGGTGTACCTAACAAATGCC  | ACGTTGGATGGTAGGTTAGCTAGTGTGTTG  | cccaTCACAAGGCTTGGCGTCA       |
| Gm13_32331620 | ACGTTGGATGAGAAACATCCGTATGGTTCA  | ACGTTGGATGTTTTGGACTCCGTATGGAC   | cccacTCCGTATGGTTCATACAAAT    |
| Gm13_32343536 | ACGTTGGATGTTTTAATTAAGAGATTGG    | ACGTTGGATGTATGACAACAGATTTGGTCC  | TTTAATATTAAGAGATTGGATTAAGG   |
| Gm13_32365734 | ACGTTGGATGGGTGCTTATTTGAGGTTGAG  | ACGTTGGATGGATACATAAAGTGAGTCTCT  | tccaATATAACTTATTATTTGGCTGGT  |
| Gm13_32586550 | ACGTTGGATGGTGGGAGATTTTCATATAG   | ACGTTGGATGCAAGCTAAGGACTGGTTGAC  | cTTAGGAGTTGATTAGCGA          |
| Gm13_32636705 | ACGTTGGATGCACTAGGGCAGTGACTTCAT  | ACGTTGGATGGGAATGTGCAAGTGTCTCTG  | ctTCGCGTGCCTTTTTT            |
| Gm13_32657362 | ACGTTGGATGACGGATCACATTGGCTATGG  | ACGTTGGATGGTTTCATTCTGTCATGCGAT  | CATTGGCTATGGAATTCGATTA       |
| Gm13_32673914 | ACGTTGGATGGGTGAATTTGACGGGTGAAC  | ACGTTGGATGATTAGTTGGGCTTGTCTGC   | GGTGAACCTAGTGGAA             |
| Gm13_32954871 | ACGTTGGATGTCACAGTAGGAGGTGTAGTC  | ACGTTGGATGTAAGTTGCTGCTCCAGCTC   | aagatGAGGTGTAGTCGTAGGA       |
| Gm13_32998715 | ACGTTGGATGTTTTCAAGATTGCGCTGGG   | ACGTTGGATGAATAGAACCTTCACGCTTC   | ccgTTGCGCTGGGTTGTGGT         |
| Gm13_33026763 | ACGTTGGATGATGCGCTTGTAGTGGATGAAC | ACGTTGGATGTCTCCGAACTGCTTGTAG    | TTGTTGGAAGAGAAAAAGCA         |
| Gm13_33027247 | ACGTTGGATGCTCCAGCCAAAGATTCTTCC  | ACGTTGGATGCTAGGGTCCAAAATCTCTG   | TAGCCAACTCTATTGCAATAATGG     |
| Gm13_33031727 | ACGTTGGATGCAATGGAGCTTATTAAGAAGG | ACGTTGGATGTTCCCTTCACATCCTTGGAG  | CTTATTAAGAAGGTATGCCAG        |
| Gm13_33057712 | ACGTTGGATGGCTTTATAGATGTTAGCCTTC | ACGTTGGATGGAGGAGAAGGTTGTTGGTC   | ctggTAGCCTTCATCTAAATGTCC     |
| Gm13_33060476 | ACGTTGGATGGACGGTGTCTTTTGTGGC    | ACGTTGGATGCAGTTTCGTAATTACATTG   | ccctcTCTTTTGTGGCTAATAAAAACTT |
| Gm13_33061634 | ACGTTGGATGTCACAACATAACGTTGCAGG  | ACGTTGGATGCTAGCCACATAGTGAAG     | ACGTTGCAGGTACAAAAA           |
| Gm13_33063980 | ACGTTGGATGCCTTCTTCGACTCTGCATTC  | ACGTTGGATGCCCTCGGAAGTTGTAATAATC | aTCTGCATTCTTCTTCTC           |
| Gm13_33124381 | ACGTTGGATGACCATGGAGTCTGCAAGAAC  | ACGTTGGATGGGGAGTTTGTCTAGGATG    | AGCAGCCACACATCC              |
| Gm13_33128103 | ACGTTGGATGACATTGATGATTAGGGTGAC  | ACGTTGGATGCAATTTACAACCTTGTCTGGG | TGTCTAATTATATAAATACATTAGCTG  |
| Gm13_33141206 | ACGTTGGATGACAACTCACAGCAGGAGTC   | ACGTTGGATGTGTTGTGTTCTGCGCTTTGG  | TATGTCTCTGGGTTTGGTG          |
| Gm13_33146523 | ACGTTGGATGCCAACTGAGCATGCATTCC   | ACGTTGGATGTCCTAATTGGCTCAGGCAAC  | TCTAGCAGCTGCGGC              |
| Gm13_33151333 | ACGTTGGATGGTCACATAAATTGTACTAC   | ACGTTGGATGGCTTTCCACTTACTCTGCTC  | acAATCTTTAAGCAAACATCAAAT     |
| Gm13_33191293 | ACGTTGGATGACATTTGGCTTCCCTAGGTG  | ACGTTGGATGCACACTCGCTCAGCGTGAT   | aaacCCCTAGGTGGCTTCTTC        |
| Gm13_33206265 | ACGTTGGATGGCCTCATTTGGTGCAGATATG | ACGTTGGATGGTCTTATAAAAACAACCAGCC | CTTTATTTGCTTATCATCCCTTT      |
| Gm13_33212151 | ACGTTGGATGGGAGCTGAAAGGTCTAAGAG  | ACGTTGGATGAAAAATGCGCTCTCCTCCC   | GTCTAAGAGCCTTTAAAAACA        |
| Gm13_33251230 | ACGTTGGATGAGGTGCGCTTAGCGTAAATC  | ACGTTGGATGAAAATCACGCGATCTCACG   | GCTAAACCCAGGAGG              |
| Gm13_33271690 | ACGTTGGATGTAACCTCTCTGCCCTTTCC   | ACGTTGGATGAGAAAAGCAACTTGAGAGGCG | aagaTATTCTTTCTCTCCACGCTCTA   |
| Gm13_33306556 | ACGTTGGATGCTTCTACCAACCTTGATACC  | ACGTTGGATGGAAATCCATGAGGGATGTTG  | CAACCTTGATACCGCTAAC          |
| Gm13_33309287 | ACGTTGGATGTTACTATAAAGTTAGTTGTG  | ACGTTGGATGTGCCCTTAAAGGTGTATCCC  | TTACTATAAGTTAGTTTGTGTGATTAA  |
| Gm13_33309683 | ACGTTGGATGGCTTCTAGCTCGTCAAGGAAC | ACGTTGGATGTCAGAATGAACTCTTCCCC   | CGTGGTCTCTGTGTG              |
| Gm13_33429985 | ACGTTGGATGCACTCGAATAAAGATCTCGG  | ACGTTGGATGTATATGGGCGAGCCAAATTC  | AGATCTCGGTTCTAAATCATTG       |
| Gm13_33433989 | ACGTTGGATGTTGCTTCTATGACAAAACAC  | ACGTTGGATGCAGAAAAGAAAAACAGCCC   | ACAAACACAATATTTACTACTTTTTAAT |
| Gm13_33434371 | ACGTTGGATGCCATCATACTCTCACACAGG  | ACGTTGGATGAGGCTTGTTCCTCCTCTTC   | ggaagCAGGAAACATTGAGACTC      |
| Gm13_33439666 | ACGTTGGATGGGACTAGAAATTAAGCTGTC  | ACGTTGGATGGAAGAAATATCACTTTGGAAC | CATTTGTACACACTTGCCT          |
| Gm13_33457770 | ACGTTGGATGTTACGAGTAGGGCAACAAC   | ACGTTGGATGAAGAACGTCGTTGCCTATGG  | TTCGGGTTACTTCGACTTAG         |
| Gm13_33488403 | ACGTTGGATGCCAACATCAATCATCCACCG  | ACGTTGGATGATGGGTGGGCTTAGATGAG   | ACCGTCCGATCCTTC              |
| Gm13_33505944 | ACGTTGGATGTACCACACCTTTTCCAACG   | ACGTTGGATGGAAGGTCATTGGAGTTGGC   | tttcCAACTTTTCCGGCCATC        |

|               |                                 |                                 |                               |
|---------------|---------------------------------|---------------------------------|-------------------------------|
| Gm13_33563545 | ACGTTGGATGCCAAAACCTCAAACAGAATG  | ACGTTGGATGTGTGTTCCATAATTTACCTC  | tgGAACTAAAAATCAAGTGTTTAGTA    |
| Gm13_33634870 | ACGTTGGATGACAACAAGGTTCTGACCTCG  | ACGTTGGATGGTGACCAATGACTTGTAGTG  | tcgaCAACATGACCTGCGTTTTGAGC    |
| Gm13_34213468 | ACGTTGGATGGTCTTGAACCTTCTCCTCGG  | ACGTTGGATGAAGAGGTTCAAGTGCTCCAG  | cAGCCAAGCCTACGAC              |
| Gm13_34233496 | ACGTTGGATGTGTTAAGTGCAGGAACACTC  | ACGTTGGATGTTGAATCCTCGTTTAGCCCG  | cggggTAAAGTGCAGGAACACTCAACTCT |
| Gm13_34248212 | ACGTTGGATGACTCCTCCACGTGTTGAATC  | ACGTTGGATGCGAGAACGGCTTTTACTTGG  | gaaaGTGTTGAATCCATGCCCGC       |
| Gm13_34293335 | ACGTTGGATGAAAGGCCCATTTTCGTGTTAG | ACGTTGGATGAGATCGGGTGGGTTAATTCG  | attaTTTTTAATTTTAAAAAGGGCATAG  |
| Gm13_34453742 | ACGTTGGATGTCGCTATGTGTCACTTGTGG  | ACGTTGGATGAGTTGTCAAGCTGCAATGCG  | tcctAGCTCAACAACCTCTG          |
| Gm13_34465720 | ACGTTGGATGTTCCGCGATGGGTTTCTTCAG | ACGTTGGATGTCTGATCCGGGAATGTTGTC  | GCTTCGACAACCTCCTC             |
| Gm13_34602307 | ACGTTGGATGTTGTTATGGGCCAAAAGTGC  | ACGTTGGATGGCCTTATTTTACTGTGG     | GGGCCAAAAGTGCCAAATTATATC      |
| Gm13_34645498 | ACGTTGGATGTTTTAAAAGGGTTCGAGTCGG | ACGTTGGATGTGATCCGATTAATCCGGTC   | ccctTCGGACCGGTCTAACCGGGATC    |
| Gm13_34701345 | ACGTTGGATGCTTGTGATTTCTGTCTCCTC  | ACGTTGGATGTTGGCCACTTCTTCACCTC   | tctaCTCATTTCTCATTTTCATGTG     |
| Gm13_34748233 | ACGTTGGATGATTGTCAAATGCACCCGAGC  | ACGTTGGATGCTGTGGTGCATCCAATTGTG  | AGCTCGATTCATCAAACTTC          |
| Gm13_34759965 | ACGTTGGATGGAATCATCATTGTTCCG     | ACGTTGGATGCATTCTCTGTGCAATCCA    | ccctAATCATCATTGTTGTTGTTTTAG   |
| Gm13_34778592 | ACGTTGGATGCGTACGTAATTTAGGAGGC   | ACGTTGGATGATTGCTGCTTTCATTATCCC  | ccccaCGCGTTTTTATCGACTG        |
| Gm13_34801784 | ACGTTGGATGCGGGACGGAAGTAGAAAAAA  | ACGTTGGATGCCTCAAAGACACTAAAAAG   | AAAGAAAAAAATATTGCTTAACCTAT    |
| Gm13_34808743 | ACGTTGGATGTCTGTATCCGTGTCTGTCC   | ACGTTGGATGAGAGTTCAGACAATGTGAAG  | gggcTCCGGTGTCCATTTTCG         |
| Gm13_34810502 | ACGTTGGATGAGTTGGATGGCATCCTGAAC  | ACGTTGGATGCTACACCATGAGCAGTTGGC  | TGATCTATTACTTATTTATGGATAAAGA  |
| Gm13_34819160 | ACGTTGGATGTGTCTGCTACTTTTTCCCCC  | ACGTTGGATGCTTGTTCGGGTCACTAGTT   | TCCCCCATATTTTGGATA            |
| Gm13_34826532 | ACGTTGGATGGCCTCAACGGACATCCAAAG  | ACGTTGGATGCCCTTTCGGAATTAGATGGC  | ACATCCAAAGAAACCGT             |
| Gm13_34828053 | ACGTTGGATGGCTCGAATACATGGACGAGG  | ACGTTGGATGCTTATCATATCCATCTGCG   | GGACGAGGTATGCTCAT             |
| Gm13_34831302 | ACGTTGGATGAGTACTTAACATCTCCTAC   | ACGTTGGATGTTGTTTGGAGGCTGTTTGAC  | TTAACATCTCCTACTATCACT         |
| Gm13_34855829 | ACGTTGGATGATGTCAGGTGGTCTAGTGG   | ACGTTGGATGACCTCCTCATATTCTGCCTC  | tTCTCAGGGTGGGGA               |
| Gm13_34859558 | ACGTTGGATGAGTTATTTGGGGTCTGGTGG  | ACGTTGGATGATGCACCTCCAAGGAGAAAC  | ggaagGGTGGGACCAAAGTGTAT       |
| Gm13_34861415 | ACGTTGGATGTGACCAAGGTGTTGACCTG   | ACGTTGGATGGCCATATCTAGGACTAAAATC | aTCTCAAGTCTCAAGCTAA           |
| Gm13_34862245 | ACGTTGGATGGAGAACAACAACAAGCTAC   | ACGTTGGATGGTACTGTATAGTGCCCTG    | caaaAACAAGCTACAACAAGTAA       |
| Gm13_34870402 | ACGTTGGATGTTCTGGATCGTGTTCAGGAG  | ACGTTGGATGAACCCAGCTTTTAGTTCCC   | CGTGTTCAGGAGGAAATT            |
| Gm13_34871976 | ACGTTGGATGCTGAGTTAGGTAGGAATAGG  | ACGTTGGATGGACCAACAGTTCAAAACGTC  | AGGTAGGAATAGGATCACTTGA        |
| Gm13_34882559 | ACGTTGGATGGCCCACTAAATTTGTGGCTA  | ACGTTGGATGATGTTGAACGTAATCCTCTC  | CAATGTATTGTGAATTGTAATATTATTG  |
| Gm13_34888379 | ACGTTGGATGCGCCCTTCTGTAAAGTGTG   | ACGTTGGATGTCTATCCATTCGACACGTGC  | ggggtTGTGATTGTGAAAGAATCC      |
| Gm13_34890355 | ACGTTGGATGATTATGGTGGTCTCACTCGC  | ACGTTGGATGGTCTTACCGTAATTTTGA    | cgagaTGTGCATTGGTAGCATTGCG     |
| Gm13_34895902 | ACGTTGGATGTGATCTCAAGGGCATTGGAC  | ACGTTGGATGTCCGAGCTTCTGACTGTG    | ggGAGGTAGCGAACTG              |

**Table S3 PCR Primers used to amplify Glyma13g30560 for y11 and y11-2.**

| PCR Reaction | Type    | Primer Pair First Reaction | Type    | Primer Pair Second Reaction (Nested) |
|--------------|---------|----------------------------|---------|--------------------------------------|
| 1            | Forward | TGGCACCCACTAACATTTCC       | Forward | TGGCACCCACTAACATTTCC                 |
| 1            | Reverse | CCAGTATCCTTTTTATTTAGGAGACC | Reverse | CCAGTATCCTTTTTATTTAGGAGACC           |
| 2            | Forward | TGGCACCCACTAACATTTCC       | Forward | CGTTTTGTCTTAAAAGCTTGATT              |
| 2            | Reverse | CACACAACACACAAAAGAATGG     | Reverse | GTTTGCAGCACACCATCC                   |
| 3            | Forward | TGGCACCCACTAACATTTCC       | Forward | TCTTCTTCTCCAAGCCTCC                  |
| 3            | Reverse | CACACAACACACAAAAGAATGG     | Reverse | CACACAACACACAAAAGAATGG               |
| 4            | Forward | GGCCAGGCCTTTGCATTTTG       | Forward | GGCCAGGCCTTTGCATTTTG                 |
| 4            | Reverse | ACTCAGCACACACCTTGGAG       | Reverse | ACTCAGCACACACCTTGGAG                 |
| 5            | Forward | CCTGACTGAGGGTGTCAAGG       | Forward | CCTGACTGAGGGTGTCAAGG                 |
| 5            | Reverse | GAAGTTAATCTTGGAGTGTATTTGC  | Reverse | GGCACTTACGTTGTCTCTCC                 |
| 6            | Forward | CCTGACTGAGGGTGTCAAGG       | Forward | GCTGAGTTGAATGTGGATGG                 |
| 6            | Reverse | GAAGTTAATCTTGGAGTGTATTTGC  | Reverse | GAAGTTAATCTTGGAGTGTATTTGC            |

**Table S4 PCR Primers used to amplify Glyma15g08680 for CD-5.**

| PCR Reaction | Type    | Primer Pair First Reaction | Type    | Primer Pair Second Reaction (Nested) |
|--------------|---------|----------------------------|---------|--------------------------------------|
| 1            | Forward | CGGAGACTGGTAAATGTGAGC      | Forward | CGGAGACTGGTAAATGTGAGC                |
| 1            | Reverse | CAGCACACCTCCAAAACAAG       | Reverse | CAGCACACCTCCAAAACAAG                 |
| 2            | Forward | GGCTAGGCCTTTGTGTTTGA       | Forward | GGCTAGGCCTTTGTGTTTGA                 |
| 2            | Reverse | AACGGGAAATGCTGATTGAG       | Reverse | AACGGGAAATGCTGATTGAG                 |
| 3            | Forward | GCTGCTGGATAGGTTTGAA        | Forward | GCTGCTGGATAGGTTTGAA                  |
| 3            | Reverse | AACGGGAAATGCTGATTGAG       | Reverse | AACGGGAAATGCTGATTGAG                 |
| 4            | Forward | TCAATTGCGGTTCTTCCTTC       | Forward | ACGTCAGCTGCTATGAATGG                 |
| 4            | Reverse | TGGCCTCTGGCTTTCTTTAG       | Reverse | GTAGCTCCAATGGCAAATC                  |
| 5            | Forward | TCAATTGCGGTTCTTCCTTC       | Forward | TCAATTGCGGTTCTTCCTTC                 |
| 5            | Reverse | TGGCCTCTGGCTTTCTTTAG       | Reverse | TGGCCTCTGGCTTTCTTTAG                 |

**Table S5 Twenty-two genes models present in the fine-mapped interval Gm13: 33,141,206..33,306,556**

| Gene          | Location                 | Gene Annotation                                                                      |
|---------------|--------------------------|--------------------------------------------------------------------------------------|
| Glyma13g30550 | Gm13: 33141000..33143927 | Transferase family                                                                   |
| Glyma13g30560 | Gm13: 33144571..33147208 | Magnesium chelatase, subunit ChII                                                    |
| Glyma13g30575 | Gm13: 33147978..33151645 | Peroxisomal NUDIX hydrolase                                                          |
| Glyma13g30590 | Gm13: 33154582..33158861 | Family not named                                                                     |
| Glyma13g30600 | Gm13: 33163957..33165210 | Zinc finger, C3HC4 type (RING finger)                                                |
| Glyma13g30610 | Gm13: 33171016..33182189 | ATP-Dependent RNA Helicase                                                           |
| Glyma13g30620 | Gm13: 33183067..33188556 | Glutamate-gated kainate-type ion channel receptor subunit GluR5 and related subunits |
| Glyma13g30625 | Gm13: 33193010..33194243 | There are no functional annotations for this locus                                   |
| Glyma13g30630 | Gm13: 33193058..33193890 | There are no functional annotations for this locus                                   |
| Glyma13g30650 | Gm13: 33194700..33195205 | There are no functional annotations for this locus                                   |
| Glyma13g30640 | Gm13: 33194530..33201169 | Glutamate-gated kainate-type ion channel receptor subunit GluR5 and related subunits |
| Glyma13g30660 | Gm13: 33204225..33209549 | Glutamate-gated kainate-type ion channel receptor subunit GluR5 and related subunits |
| Glyma13g30670 | Gm13: 33210247..33214795 | D-Tyr-tRNA (Tyr) deacylase                                                           |
| Glyma13g30680 | Gm13: 33221124..33226612 | GDSL-like Lipase/Acylhydrolase                                                       |
| Glyma13g30690 | Gm13: 33231142..33237718 | GDSL-like Lipase/Acylhydrolase                                                       |
| Glyma13g30710 | Gm13: 33243653..33244787 | Regulation of transcription, DNA-dependent                                           |
| Glyma13g30720 | Gm13: 33247690..33248688 | Regulation of transcription, DNA-dependent                                           |
| Glyma13g30730 | Gm13: 33259622..33263250 | Pterin carbinolamine dehydratase PCBD/dimerization cofactor of HNF1                  |
| Glyma13g30740 | Gm13: 33263320..33264787 | Protein of unknown function, DUF599                                                  |
| Glyma13g30750 | Gm13: 33280224..33286703 | Auxin response factor                                                                |
| Glyma13g30760 | Gm13: 33291706..33297139 | Mlo family                                                                           |
| Glyma13g30770 | Gm13: 33302261..33303185 | Glutaredoxin                                                                         |

**Table S6 Soybean CHLI Genes and Expression Data.** Normalized soybean expression data showing that Glyma13g30560 and Glyma15g08680 share similar expression patterns, however Glyma13g30560 showing approximately twice the expression level in leaf tissues. Source: Severin, AJ, Woody JL, Bolon YT, Joseph B, Diers BW, et al. (2010) RNA-Seq Atlas of Glycine max: a guide to the soybean transcriptome. BMC Plant Biol 10:160.

| Gene          | Young leaf | Flower | One cm pod | Pod shell 10DAF | Pod shell 14DAF | Seed 10DAF | Seed 14DAF | Seed 21DAF | Seed 25DAF | Seed 28DAF | Seed 35DAF | Seed 42DAF | Root | Nodule |
|---------------|------------|--------|------------|-----------------|-----------------|------------|------------|------------|------------|------------|------------|------------|------|--------|
| Glyma13g30560 | 106        | 16     | 38         | 41              | 33              | 2          | 3          | 6          | 8          | 6          | 8          | 3          | 1    | 1      |
| Glyma15g08680 | 51         | 8      | 16         | 18              | 17              | 2          | 5          | 7          | 9          | 5          | 7          | 3          | 1    | 1      |
| Glyma07g32550 | 2          | 3      | 2          | 1               | 1               | 1          | 1          | 1          | 1          | 0          | 0          | 0          | 2    | 1      |
| Glyma13g24050 | 0          | 2      | 0          | 0               | 1               | 1          | 2          | 0          | 1          | 0          | 1          | 0          | 1    | 1      |



Figure S1

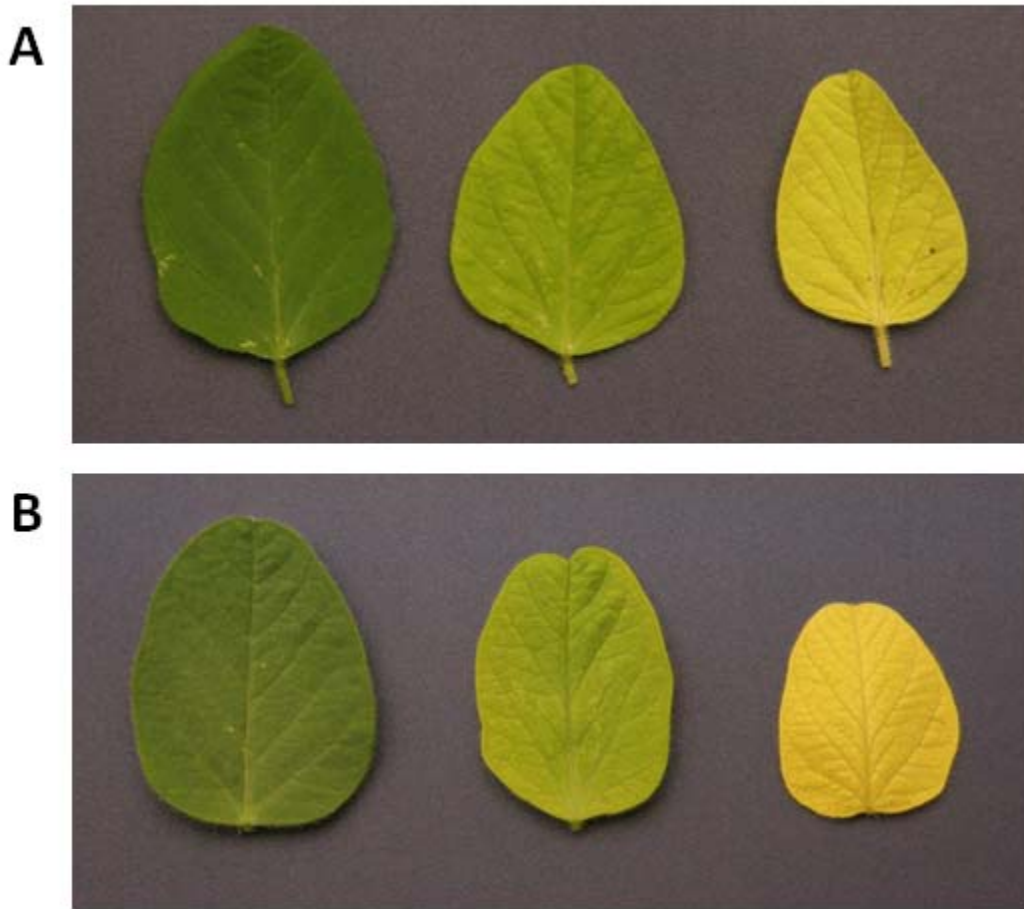

**Figure S1** Phenotypic classes for chlorophyll deficiency mutants. (A) Leaves of *Y11/Y11*, *Y11/y11*, and *y11/y11* leaves showing the distinctive phenotypic classes. (B) Leaves of *WT/WT*, *WT/CD-5*, and *CD-5/CD-5* leaves showing the distinctive phenotypic classes.

Figure S2

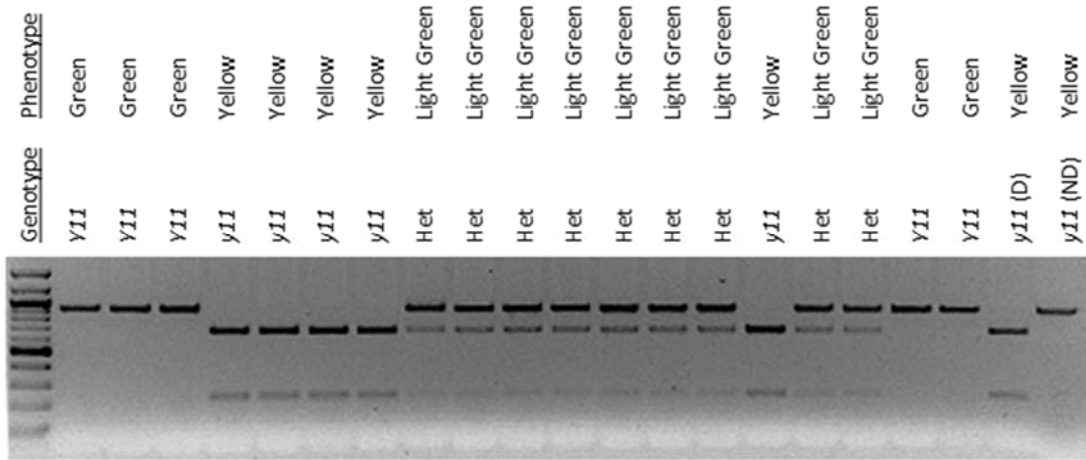

**Figure S2** *y11* CAPS assay. A Cleaved Amplified Polymorphic Sequences (CAPS) assay of nineteen individuals segregating for the presence of the candidate *y11* SNP. In the rightmost lanes, D indicates a *y11/y11* digested sample and a ND indicates a *y11/y11* sample that was not digested. The perfect cosegregation of the candidate *y11* SNP with the foliage phenotype provides additional information to suggest that the candidate SNP is responsible for the chlorophyll deficient phenotype.

Figure S3

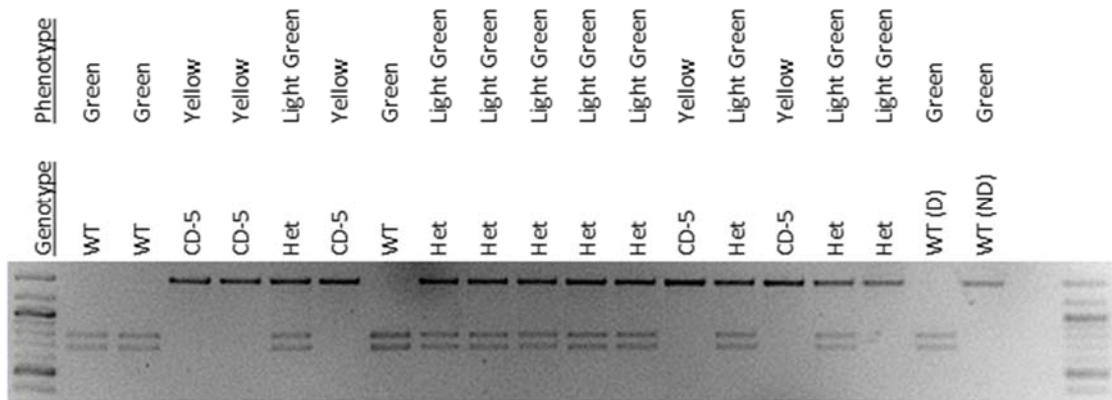

**Figure S3** A Cleaved Amplified Polymorphic Sequences (CAPS) assay of seventeen individuals segregating for the presence of the candidate CD-5 SNP. In the rightmost lanes, D indicates a WT/WT digested sample and a ND indicates a WT/WT sample that was not digested. The perfect cosegregation of the candidate CD-5 SNP with the foliage phenotype provides additional information to suggest that the candidate SNP is responsible for the chlorophyll deficient phenotype.

Figure S4

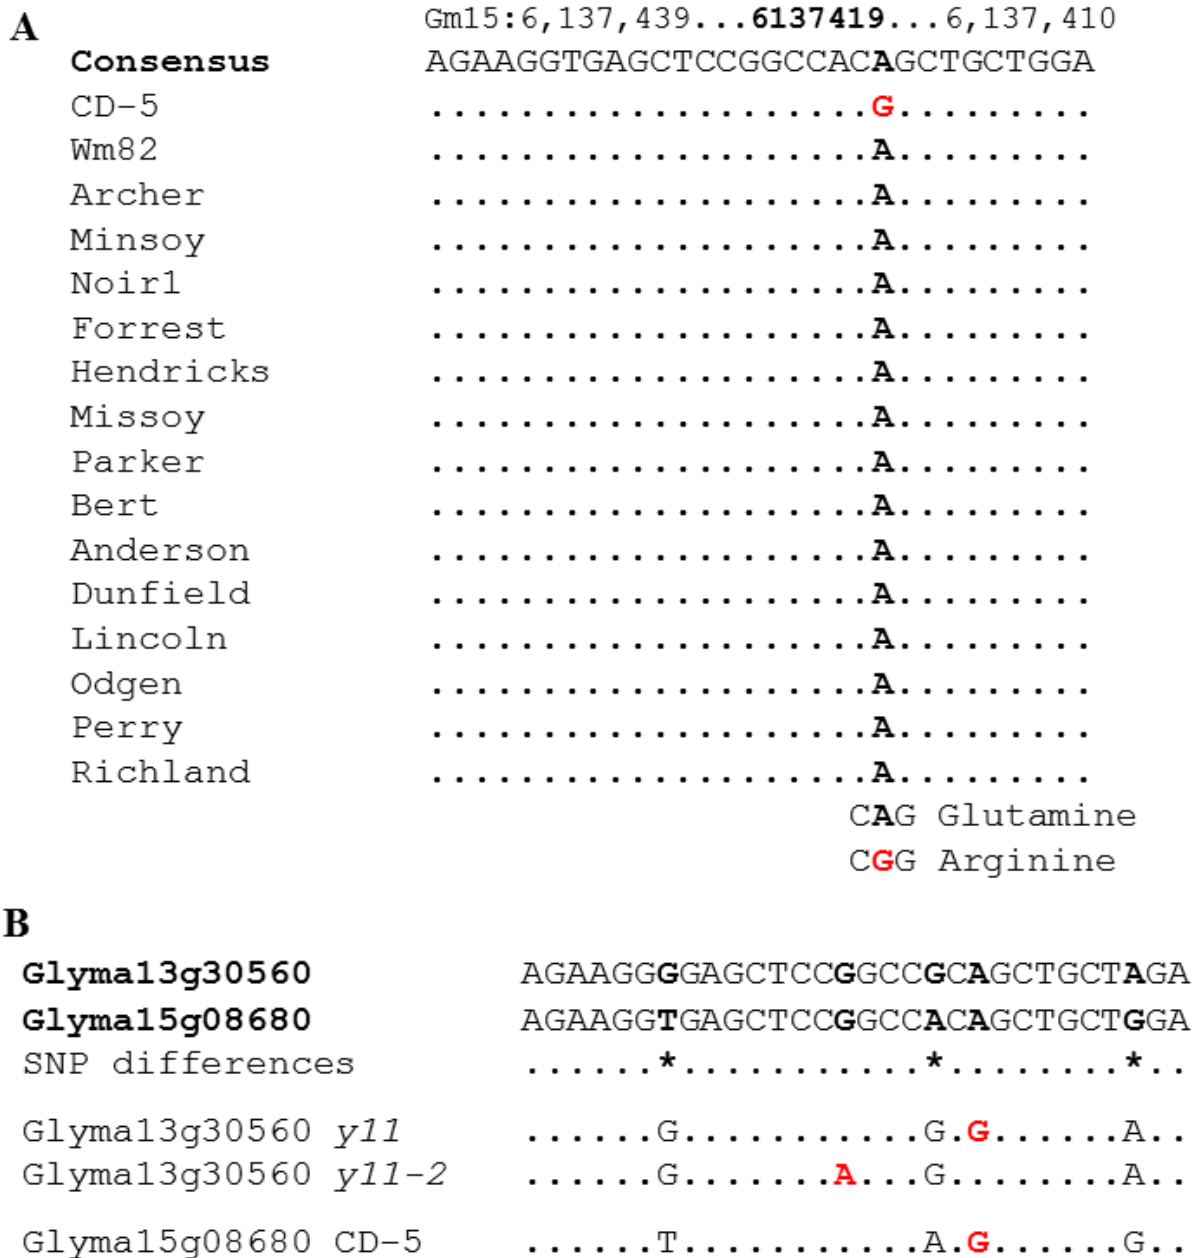

**Figure S4** The CD-5 mutation in the candidate gene Glyma15g08680 appears to be a novel *de novo* mutation. (A) Sequence results of CD-5 compared to a panel of diverse soybean lines. Of the 29 diverse soybean lines sequenced (15 are shown), only CD-5 was found to have Guanine rather than Adenine at position 6137419. The CD-5 SNP causes a nonsynonymous change from Glutamine to Arginine. (B) Sequences from Glyma13g30560 and Glyma15g08680 showing that the *y11* and CD-5 SNPs in the separate genes occur at the same relative SNP position, but that sequences from the two genes can be differentiated by nearby SNPs. Sequences for Glyma13g30560 and Glyma15g08680 are from positions Gm13:33,146,509..33,146,538 and Gm15:6,137,439..6,137,410, respectively.

Figure S5

```

Consensus  MAS.LGTSSI  AVLPSR..SS  .SSKPSIHTL  SLTSGQ.YGR  KFYGGIGIHG  50
Gma Chl1a  ...A.....  .....YF..  S.....  .....N...  .....
Gma Chl1b  ...T.....  .....CI..  F.....  .....S...  .....

Consensus  IKGR.QLSV.  NVATEVNSVE  QAQSIASKES  QRPVYPFSAI  VGQDEMKLCL  100
Gma Chl1a  ....A....T  .....  .....  .....  .....
Gma Chl1b  ....S....A  .....  .....  .....  .....

Consensus  LLNVIDPKIG  GVMIMGDRGT  GKSTTVRSLV  DLLPEIKVVA  GDPYNSDPQD  150
Gma Chl1a  .....  .....  .....  .....  .....
Gma Chl1b  .....  .....  .....  .....  .....

Consensus  PEFMGVEVRE  RVLQGEELSV  VLTKINMVDL  PLGATEDRVC  GTIDIEKALT  200
Gma Chl1a  .....  .....  .....  .....  .....
Gma Chl1b  .....  .....  .....  .....  .....

Consensus  EGVKAFEPGL  LAKANRGILY  VDEVNLLDDH  LVDVLLDSAA  SGWNTVEREG  250
Gma Chl1a  .....  .....  .....  .....  .....
Gma Chl1b  .....  .....  .....  .....  .....

Consensus  ISISHPARFI  LIGSGNPEEG  ELRPOLLDRF  GMHAQVGTVR  DAELRVKIVE  300
Gma Chl1a  .....  .....  .....  .....  .....
Gma Chl1b  .....  .....  .....  .....  .....

Consensus  ERGRFDKNPK  EFRDSYKAEQ  EKLQQQITSA  RSVLSSVQID  QDLKVKISKV  350
Gma Chl1a  .....  .....  .....  .....  .....
Gma Chl1b  .....  .....  .....  .....  .....

Consensus  CAELNVDGLR  GDIVTNRAAK  ALAALK.RD.  VSAEDIATVI  PNCLRHLRLK  400
Gma Chl1a  .....  .....  .....G..N  .....  .....
Gma Chl1b  .....  .....  .....E..K  .....  .....

Consensus  DPLESIDSGL  LVTEKFYEVF  S 421
Gma Chl1a  .....  .....  .
Gma Chl1b  .....  .....  .

```

**Figure S5** Amino acid sequence comparison of Chl1a (Glyma13g30560) to Chl1b (Glyma15g08680) showing the high degree of similarity between the two Mg-chelatase subunits. The two boxed residues indicate the positions of the  $\gamma$ 11-2 (R273Q) mutation and  $\gamma$ 11 and CD-5 (Q275R) mutations.

Figure S6

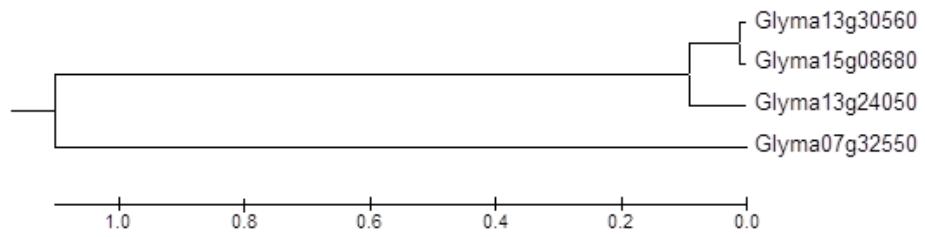

**Figure S6** The inferred evolutionary history for the four Glycine Max ChII subunits calculated using the UPGMA method. The UPGMA neighbor joining tree shows the close sequence similarity of Glyma13g30560 with Glyma15g08680. The optimal tree with the sum of branch length = 2.30757376 is shown.
