# Supplementary material for: Identical Substitutions in Magnesium Chelatase Paralogs Result in Chlorophyll-Deficient Soybean Mutants
Source: PubMed Central journal article supplement (PMC4291463; doi:10.1534/g3.114.015255), 2014-12-01
Supplement: supp_g3.114.015255_FigureS1.pdf [file supp_g3.114.015255_FigureS1.pdf]

Figure S1

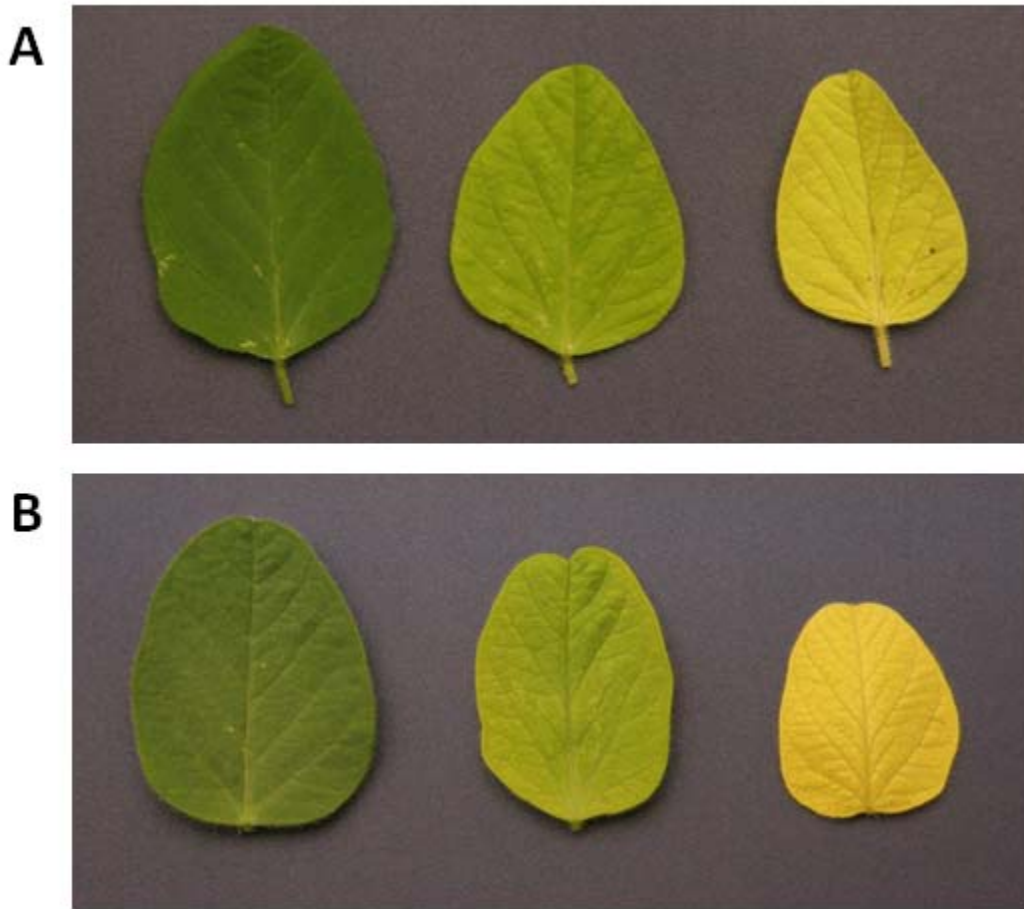

**Figure S1** Phenotypic classes for chlorophyll deficiency mutants. (A) Leaves of *Y11/Y11*, *Y11/y11*, and *y11/y11* leaves showing the distinctive phenotypic classes. (B) Leaves of *WT/WT*, *WT/CD-5*, and *CD-5/CD-5* leaves showing the distinctive phenotypic classes.
