# Supplementary material for: Identical Substitutions in Magnesium Chelatase Paralogs Result in Chlorophyll-Deficient Soybean Mutants
Source: PubMed Central journal article supplement (PMC4291463; doi:10.1534/g3.114.015255), 2014-12-01
Supplement: supp_g3.114.015255_TableS1.pdf [file supp_g3.114.015255_TableS1.pdf]

**Table S1 Primer sequences for Sequenom MassARRAY assays used for the first round of fine-mapping for the MinnGold mutation.**

| SNP_ID            | 2nd-PCR                         | 1st-PCR                          | UEP_SEQ                      |
|-------------------|---------------------------------|----------------------------------|------------------------------|
| Gm13_19279455_A_G | ACGTTGGATGTGAACATTGCCTGCTAAGCG  | ACGTTGGATGTTTTGGGCTTGGTGTGAAG    | ccccCCAATTAGATCTGCAGAAC      |
| Gm13_23724744_A_G | ACGTTGGATGACGTTTCACCCATGAACACC  | ACGTTGGATGCTAGTACTCGGATATTCAGC   | ccTCCACTCACCAGTATCA          |
| Gm13_24148253_C_T | ACGTTGGATGCATGACATGTTGAGCCAACC  | ACGTTGGATGTGATTGGTTGCGCATGTGAC   | TGAGCCAACCTAGTCAT            |
| Gm13_25508582_A_G | ACGTTGGATGCGTCTAGACTCTTTCTGTTC  | ACGTTGGATGTATGTACTGACCTCTCATGC   | TGCTTGTATCTCATAGAGATAAATAAAC |
| Gm13_25737735_G_A | ACGTTGGATGGTATGGTTTGTATATTGTGG  | ACGTTGGATGTATACTCCAGCGAAGTCCC    | acatgTTGTATATTGTGGACCAACC    |
| Gm13_26671230_A_G | ACGTTGGATGGGCATTTTGTGCTGCAGA    | ACGTTGGATGCCATTGGTCGATTGTACTGG   | TTTTGTGCTGCAGAAAATAAAT       |
| Gm13_27212330_G_A | ACGTTGGATGAGCAAAGCAGCACTTGCATC  | ACGTTGGATGCTTGTGAGAATATTTACAATCC | ccccCGTGAACGTCCTCCGGGCAAA    |
| Gm13_27413980_G_A | ACGTTGGATGCTTTTTGATTGTTTTGTTG   | ACGTTGGATGTCAGCAATCTACTGCAGTTG   | TTTTAATTGTAAAGTTCAAAAACCTA   |
| Gm13_27781688_C_A | ACGTTGGATGCTATCTGCAATGATCTTTTC  | ACGTTGGATGACATTCTACATCGATCACGC   | TGCAATGATCTTTCAAGCCTA        |
| Gm13_28465103_C_T | ACGTTGGATGTTTACGTTGGTACCTCCGAA  | ACGTTGGATGTCGGCCCTCATATGATAAG    | gGGTACCTCCGAATAACTG          |
| Gm13_28812235_A_G | ACGTTGGATGCCGACTATCGTAGTGAGATG  | ACGTTGGATGCTTTTATGCCAACAAGTGGG   | GATGTTGATTGCTCTATGTCTAAA     |
| Gm13_29565413_G_A | ACGTTGGATGGCAGAACAACCTCATGTATCG | ACGTTGGATGAAGAGCTGATCCTAACTCCC   | ggatgACAATGCCAATCACTAAGAAAAA |
| Gm13_29946365_G_A | ACGTTGGATGTGTGGGTATGACCAATCTCC  | ACGTTGGATGGATCAATGGTATGTTTGTCC   | gcacTCTCCATTGTGAAACAACAAGG   |
| Gm13_30268845_G_A | ACGTTGGATGCGCCTTTGCGCACATCATC   | ACGTTGGATGGTATGGACTTGAGGAAATGG   | CACATCATCACCCGC              |
| Gm13_30581811_C_T | ACGTTGGATGTACACCGCTAGCTACTTCAC  | ACGTTGGATGACGACGGTTTTGGAGTTAGC   | CTAGCTACTTCACAGGTAA          |
| Gm13_31595360_C_T | ACGTTGGATGTTACGATGGTGTGCAAC     | ACGTTGGATGTCCTTGACACAACAACATCCG  | CAGTCCGAACGGTAG              |
| Gm13_32120834_T_C | ACGTTGGATGCTCCCAAAGTTTCCAATCGG  | ACGTTGGATGAGGGTTCACTCCAGACCTT    | CAAGCCATCGGTTTCC             |
| Gm13_33031727_T_C | ACGTTGGATGCAATGGAGCTTATTAAGAAGG | ACGTTGGATGTGACACAAGAAAGAAAATC    | GCTTATTAAGAAGGTATGCCAG       |
| Gm13_33302559_G_A | ACGTTGGATGAACGCGGTGTAATCATTGG   | ACGTTGGATGAGACAGCTTTTATCCCATCC   | gggagTGTGCCACGTGGTAAAAAG     |
| Gm13_33471044_G_A | ACGTTGGATGCAACAAGTGATCTCGACTCC  | ACGTTGGATGATTGCTGCTTTTATTATCCC   | ggtgACGAGTCAAAGCTAAAGAATAA   |
| Gm13_34624477_T_C | ACGTTGGATGTTGAGCAGCGGCTAAAAGAG  | ACGTTGGATGTGAAGGGCTTATGGAGATC    | gtgatCAGCGGCTAAAAGAGAGGCCA   |
| Gm13_34778592_C_T | ACGTTGGATGCGTACGTAATTTTAGGAGGC  | ACGTTGGATGTTGTTGCCGCTCTCATCAC    | ggatGAGGCGGTTTTTATCGACTG     |
| Gm13_35053712_C_A | ACGTTGGATGTCAGGAATTGGTAGGTCAGG  | ACGTTGGATGGAAAGTTGTGCATGGTGGTG   | gGGTCAGGCACAGTAAC            |
| Gm13_35188028_A_G | ACGTTGGATGAACACAACCGCTTTTCTCAC  | ACGTTGGATGAGTGTGTGAGGGAAGATTCG   | ctcgTTTCTACAAGCATCTCTG       |
| Gm13_35492939_T_C | ACGTTGGATGAAAACCTAACCGCACACTG   | ACGTTGGATGGCAGATGGTGGTATGAAAAG   | tcccGCTACGCACAACAAAAATAACCCA |
| Gm13_36007185_T_C | ACGTTGGATGCCTTGGCCAAACTTATCCTC  | ACGTTGGATGACTTGTCTCCTTACACCCAC   | ccctAGTCAACTCAACCTCAC        |
| Gm13_36188290_G_A | ACGTTGGATGGAGACACGTAGATGGAACAC  | ACGTTGGATGCCTGTTGCACATGTTCCAT    | ccctATGGAACACATTAACACAGCGAG  |
| Gm13_36252057_G_A | ACGTTGGATGATACAATTGAAAGCAGGGAC  |                                  | cGGGAGAAAGGGTATGG            |
| Gm13_36445455_T_C | ACGTTGGATGACTCTTCCCTCATGCTGATG  |                                  | ACCTTTAAGCTCATAGAGCAT        |
| Gm13_38030960_T_C | ACGTTGGATGCATCAGCATACCTTGAACAG  |                                  | ACAGAAAGACAAAGGTTATG         |
