# Supplementary material for: Identical Substitutions in Magnesium Chelatase Paralogs Result in Chlorophyll-Deficient Soybean Mutants
Source: PubMed Central journal article supplement (PMC4291463; doi:10.1534/g3.114.015255), 2014-12-01
Supplement: supp_g3.114.015255_TableS2.pdf [file supp_g3.114.015255_TableS2.pdf]

**Table S2 Primer sequences for Sequenom MassARRAY assays used for the second round of fine-mapping for the MinnGold mutation.**

| SNP_ID        | 2nd-PCR                         | 1st-PCR                         | UEP_SEQ                      |
|---------------|---------------------------------|---------------------------------|------------------------------|
| Gm13_32186965 | ACGTTGGATGACTGACTTTTTCCCTTTCG   | ACGTTGGATGCAGTGACGATAATTTTAAAGC | actagTTATACTCCCTGTCTCATTATGT |
| Gm13_32293065 | ACGTTGGATGGAGTCTATCCGTTTTATCAC  | ACGTTGGATGCGAGTTGCACGTACGAATAC  | gtctcTCCGTTTTATCACTTTTACTC   |
| Gm13_32316109 | ACGTTGGATGAGGTGTACCTAACAAATGCC  | ACGTTGGATGGTAGGTTAGCTAGTGTGTTG  | cccaTCACAAGGCTTGGCGTCA       |
| Gm13_32331620 | ACGTTGGATGAGAAACATCCGTATGGTTCA  | ACGTTGGATGTTTTGGACTCCGTATGGAC   | cccacTCCGTATGGTTCATACAAAT    |
| Gm13_32343536 | ACGTTGGATGTTTTAATTAAGAGATTGG    | ACGTTGGATGTATGACAACAGATTTGGTCC  | TTTAATATTAAGAGATTGGATTAAGG   |
| Gm13_32365734 | ACGTTGGATGGGTGCTTATTTGAGGTTGAG  | ACGTTGGATGGATACATAAAGTGAGTCTCT  | tccaATATAACTTATTATTTGGCTGGT  |
| Gm13_32586550 | ACGTTGGATGGTGGGAGAGTTTTCATATAG  | ACGTTGGATGCAAGCTAAGGACTGGTTGAC  | cTTAGGAGTTGATTAGCGA          |
| Gm13_32636705 | ACGTTGGATGCACTAGGGCAGTGACTTCAT  | ACGTTGGATGGGAATGTGCAAGTGTCTCTG  | ctTCGCGTGCCTTTTTT            |
| Gm13_32657362 | ACGTTGGATGACGGATCACATTGGCTATGG  | ACGTTGGATGGTTTCATTCTGTCATGCGAT  | CATTGGCTATGGAATTCGATTA       |
| Gm13_32673914 | ACGTTGGATGGGTGAATTTGACGGGTGAAC  | ACGTTGGATGATTAGTTGGGCTTGTCCG    | GGTGAACCTAGTGGAA             |
| Gm13_32954871 | ACGTTGGATGTCACAGTAGGAGGTGTAGTC  | ACGTTGGATGTAAGTTGCTGCTCCAGCTC   | aagatGAGGTGTAGTCGTAGGA       |
| Gm13_32998715 | ACGTTGGATGTTTTCAAGATTGCGCTGGG   | ACGTTGGATGAATAGAACCTTCACGCTTC   | ccgTTGCGCTGGGTTGTGGT         |
| Gm13_33026763 | ACGTTGGATGATGCGCTTGAGTGGATGAAC  | ACGTTGGATGTCTCCGGAAGTCTTGTAG    | TTGTTGGAAGAGAAAAAGCA         |
| Gm13_33027247 | ACGTTGGATGCTCCAGCCAAAGATTCTTCC  | ACGTTGGATGCTAGGGTCCAAAATCTCTG   | TAGCCAACTCTATTGCAATAATGG     |
| Gm13_33031727 | ACGTTGGATGCAATGGAGCTTATTAAGAAGG | ACGTTGGATGTTCCCTTCACATCCTTGGAG  | CTTATTAAGAAGGTATGCCAG        |
| Gm13_33057712 | ACGTTGGATGGCTTTATAGATGTTAGCCTTC | ACGTTGGATGGAGGAGAAGGTTGTTGGTC   | ctggTAGCCTTCATCTAAATGTCC     |
| Gm13_33060476 | ACGTTGGATGGACGGTGTCTTTTGTGGC    | ACGTTGGATGCAGTTTCGTAATTACATTG   | ccctcTCTTTTGTGGCTAATAAAAACTT |
| Gm13_33061634 | ACGTTGGATGTCACAACATAACGTTGCAGG  | ACGTTGGATGCTAGCCACATAGTGAAG     | ACGTTGCAGGTACAAAAA           |
| Gm13_33063980 | ACGTTGGATGCCTTCTTCGACTCTGCATTC  | ACGTTGGATGCCCTCGGAAGTTGTAATAATC | aTCTGCATTCTTCTTCTC           |
| Gm13_33124381 | ACGTTGGATGACCATGGAGTCTGCAAGAAC  | ACGTTGGATGGGGAGTTTGTGATGAGGATG  | AGCAGCCACACATCC              |
| Gm13_33128103 | ACGTTGGATGACATTGATGATTAGGGTGAC  | ACGTTGGATGCAATTTACAACCTGTTCCGGG | TGTCTAATTATATAAATACATTAGCTG  |
| Gm13_33141206 | ACGTTGGATGACAACTCACAGCAGGAGTC   | ACGTTGGATGTGTTGTGTTCTGCGCTTTGG  | TATGTCTCTGGGTTTGGTG          |
| Gm13_33146523 | ACGTTGGATGCCAACTTGAGCATGCATTCC  | ACGTTGGATGTCCTAATTGGCTCAGGCAAC  | TCTAGCAGCTGCGGC              |
| Gm13_33151333 | ACGTTGGATGGTCACATAAATTGTACTAC   | ACGTTGGATGGCTTTCCACTTACTCTGCTC  | acAATCTTTAAGCAAACATCAAAT     |
| Gm13_33191293 | ACGTTGGATGACATTTGGCTTCCCTAGGTG  | ACGTTGGATGCACACTCGCTCAGCGTGAT   | aaacCCCTAGGTGGCTTCTTC        |
| Gm13_33206265 | ACGTTGGATGGCCTCATTTGGTGCAGATATG | ACGTTGGATGGTCTTATAAAAACAACCAGCC | CTTTATTTGCTTATCATCCCTTT      |
| Gm13_33212151 | ACGTTGGATGGGAGCTGAAAGGTCTAAGAG  | ACGTTGGATGAAAAATGCGCTCTCCTCCC   | GTCTAAGAGCCTTTAAAAACA        |
| Gm13_33251230 | ACGTTGGATGAGGTGCGCTTAGCGTAAATC  | ACGTTGGATGAAAATCACGCGATCTCACG   | GCTAAACCCAGGAGG              |
| Gm13_33271690 | ACGTTGGATGTAACCTCTGCCCCCTTTCC   | ACGTTGGATGAGAAAAGCAACTTGAGAGGCG | aagaTATTCTTTCTCTCCACGCTCTA   |
| Gm13_33306556 | ACGTTGGATGCTTCTACCAACCTTGATACC  | ACGTTGGATGGAAATCCATGAGGGATGTTG  | CAACCTTGATACCGCTAAC          |
| Gm13_33309287 | ACGTTGGATGTTACTATAAAGTTAGTTGTG  | ACGTTGGATGTGCCCTTAAAGGTGTATCCC  | TTACTATAAGTTAGTTTGTGTGATTAA  |
| Gm13_33309683 | ACGTTGGATGGCTTCTAGCTCGTCAAGGAAC | ACGTTGGATGTCAGAATGAACTCTTGCCC   | CGTGGTCTCTGTGTG              |
| Gm13_33429985 | ACGTTGGATGCACTCGAATAAAGATCTCGG  | ACGTTGGATGTATAGGGCGAGCCAAATTC   | AGATCTCGGTTCTAAATCATTG       |
| Gm13_33433989 | ACGTTGGATGTTGCTTCTATGACAAAACAC  | ACGTTGGATGCAGAAAAGAAAAACAGCCC   | ACAAACACAATATTTACTACTTTTTAAT |
| Gm13_33434371 | ACGTTGGATGCCATCATACTCTCACACAGG  | ACGTTGGATGAGGTCTTGTTCCTCCTCTC   | ggaagCAGGAAACATTGAGACTC      |
| Gm13_33439666 | ACGTTGGATGGGACTAGAAATTAAGCTGTC  | ACGTTGGATGGAAGAAATATCACTTTGGAAC | CATTTGTACACACTTGCCT          |
| Gm13_33457770 | ACGTTGGATGTTACGAGTAGGGCAACAAC   | ACGTTGGATGAAGAACGTCGTTGCCTATGG  | TTCGGGTTACTTCGACTTAG         |
| Gm13_33488403 | ACGTTGGATGCCAACATCAATCATCCACCG  | ACGTTGGATGATGGGTGGGCTTTAGATGAG  | ACCGTCCGATCCTTC              |
| Gm13_33505944 | ACGTTGGATGTACCACACCTTTTCCAACG   | ACGTTGGATGGAAGGTCATTGGAGTTGGC   | tttcCAACTTTTCCGGCCATC        |

|               |                                 |                                 |                               |
|---------------|---------------------------------|---------------------------------|-------------------------------|
| Gm13_33563545 | ACGTTGGATGCCAAAACCTCAAACAGAATG  | ACGTTGGATGTGTGTTCCATAATTTACCTC  | tgGAACTAAAAATCAAGTGTTTAGTA    |
| Gm13_33634870 | ACGTTGGATGACAACAAGGTTCTGACCTCG  | ACGTTGGATGGTGACCAATGACTTGTAGTG  | tcgaCAACATGACCTGCGTTTTGAGC    |
| Gm13_34213468 | ACGTTGGATGGTCTTGAACCTTCTCCTCGG  | ACGTTGGATGAAGAGGTTCAAGTGCTCCAG  | cAGCCAAGCCTACGAC              |
| Gm13_34233496 | ACGTTGGATGTGTTAAGTGCAGGAACACTC  | ACGTTGGATGTTGAATCCTCGTTTAGCCCG  | cggggTAAAGTGCAGGAACACTCAACTCT |
| Gm13_34248212 | ACGTTGGATGACTCCTCCACGTGTTGAATC  | ACGTTGGATGCGAGAACGGCTTTTACTTGG  | gaaaGTGTTGAATCCATGCCCGC       |
| Gm13_34293335 | ACGTTGGATGAAAGGCCCATTTCTGTGTTAG | ACGTTGGATGAGATCGGGTGGGTTAATTCG  | attaTTTTTAATTTTAAAAAGGGCATAG  |
| Gm13_34453742 | ACGTTGGATGTCGCTATGTGTCACTTGTGG  | ACGTTGGATGAGTTGTCAAGCTGCAATGCG  | tcctAGCTCAACAACCTCTG          |
| Gm13_34465720 | ACGTTGGATGTTCCGCGATGGGTTTCTTCAG | ACGTTGGATGTCTGATCCGGGAATGTTGTC  | GCTTCGACAACCTCCTC             |
| Gm13_34602307 | ACGTTGGATGTTGTTATGGGCCAAAAGTGC  | ACGTTGGATGGCCTTATTTTACTGTGG     | GGGCCAAAAGTGCCAAATTATATC      |
| Gm13_34645498 | ACGTTGGATGTTTTAAAAGGGTTCGAGTCGG | ACGTTGGATGTGATCCGATTAATCCGGTC   | ccctTCGGACCGGTCTAACCGGGATC    |
| Gm13_34701345 | ACGTTGGATGCTTGTGATTTCTGTCTCCTC  | ACGTTGGATGTTGGCCACTTCTTCACCTC   | tctaCTCATTTCTCATTTTCATGTG     |
| Gm13_34748233 | ACGTTGGATGATTGTCAAATGCACCCGAGC  | ACGTTGGATGCTGTGGTGCATCCAATTGTG  | AGCTCGATTCATCAAACTTC          |
| Gm13_34759965 | ACGTTGGATGGAATCATCATTGTTCCG     | ACGTTGGATGCATTCTCTGTGCAATCCA    | ccctAATCATCATTGTTGTTGTTTTAG   |
| Gm13_34778592 | ACGTTGGATGCGTACGTAATTTAGGAGGC   | ACGTTGGATGATTGCTGCTTTCATTATCCC  | ccccaCGCGTTTTTATCGACTG        |
| Gm13_34801784 | ACGTTGGATGCGGGACGGAAC TAGAAAAAA | ACGTTGGATGCCTCAAAGACACTAAAAAG   | AAAGAAAAAAATATTGCTTAACCTAT    |
| Gm13_34808743 | ACGTTGGATGTCTGTATCCGTGTCGTGTCC  | ACGTTGGATGAGAGTTCAGACAATGTGAAG  | gggcTCCGGTGTCCATTTCCG         |
| Gm13_34810502 | ACGTTGGATGAGTTGGATGGCATCCTGAAC  | ACGTTGGATGCTACACCATGAGCAGTTGGC  | TGATCTATTACTTATTTATGGATAAAGA  |
| Gm13_34819160 | ACGTTGGATGTGTCTGCTACTTTTTCCCCC  | ACGTTGGATGCTTGTTCGGGTCACTAGTT   | TCCCCCATATTTTGGATA            |
| Gm13_34826532 | ACGTTGGATGGCCTCAACGGACATCCAAAG  | ACGTTGGATGCCCTTTCGGAATTAGATGGC  | ACATCCAAAGAAACCGT             |
| Gm13_34828053 | ACGTTGGATGGCTCGAATACATGGACGAGG  | ACGTTGGATGCTTATCATATCCATCTGCG   | GGACGAGGTATGCTCAT             |
| Gm13_34831302 | ACGTTGGATGAGTACTTAACATCTCCTAC   | ACGTTGGATGTTGTTTGAGGCTGTTTGAC   | TTAACATCTCCTACTATCACT         |
| Gm13_34855829 | ACGTTGGATGATGTCAGGTGGTCTAGTGG   | ACGTTGGATGACCTCCTCATATTCTGCCTC  | tTTCTCAGGGTGGGGA              |
| Gm13_34859558 | ACGTTGGATGAGTTATTTGGGGTCTGGTGG  | ACGTTGGATGATGCACCTCCAAGGAGAAAC  | ggaagGGTGGGACCAAAGTGTAT       |
| Gm13_34861415 | ACGTTGGATGTGACCAAGGTGTTGACCTG   | ACGTTGGATGGCCATATCTAGGACTAAAATC | aTCTCAAGTCTCAAGCTAA           |
| Gm13_34862245 | ACGTTGGATGGAGAACAACAACAAGCTAC   | ACGTTGGATGGTACTGTATAGTGCCCTG    | caaaAACAAGCTACAACAAGTAA       |
| Gm13_34870402 | ACGTTGGATGTTCTGGATCGTGTTCAGGAG  | ACGTTGGATGAACCCAGCTTTTAGTTCCC   | CGTGTTCAGGAGGAAATT            |
| Gm13_34871976 | ACGTTGGATGCTGAGTTAGGTAGGAATAGG  | ACGTTGGATGGACCAACAGTTCAAAAACGTC | AGGTAGGAATAGGATCACTTGA        |
| Gm13_34882559 | ACGTTGGATGGCCCACTAAATTTGTGGCTA  | ACGTTGGATGATGTTGAACGTAATCCTCTC  | CAATGTATTGTGAATTGTAATATTATTG  |
| Gm13_34888379 | ACGTTGGATGCGCCCTTCTGTAAAGTGTG   | ACGTTGGATGTCTATCCATTCGACACGTGC  | ggggTGTGATTGTGAAAGAATCC       |
| Gm13_34890355 | ACGTTGGATGATTATGGTGGTCTCACTCGC  | ACGTTGGATGGTCTTACCGTAATTTGGA    | cgagaTGTGCATTGGTAGCATTGCG     |
| Gm13_34895902 | ACGTTGGATGTGATCTCAAGGGCATTGGAC  | ACGTTGGATGTCCGAGCTTCTGACTGTG    | ggGAGGTAGCGAACTG              |
