# Supplementary material for: Identical Substitutions in Magnesium Chelatase Paralogs Result in Chlorophyll-Deficient Soybean Mutants
Source: PubMed Central journal article supplement (PMC4291463; doi:10.1534/g3.114.015255), 2014-12-01
Supplement: supp_g3.114.015255_TableS3.pdf [file supp_g3.114.015255_TableS3.pdf]

**Table S3 PCR Primers used to amplify Glyma13g30560 for y11 and y11-2.**

| PCR Reaction | Type    | Primer Pair First Reaction | Type    | Primer Pair Second Reaction (Nested) |
|--------------|---------|----------------------------|---------|--------------------------------------|
| 1            | Forward | TGGCACCCACTAACATTTCC       | Forward | TGGCACCCACTAACATTTCC                 |
| 1            | Reverse | CCAGTATCCTTTTTATTTAGGAGACC | Reverse | CCAGTATCCTTTTTATTTAGGAGACC           |
| 2            | Forward | TGGCACCCACTAACATTTCC       | Forward | CGTTTTGTCTTAAAAGCTTGATT              |
| 2            | Reverse | CACACAACACACAAAAGAATGG     | Reverse | GTTTGCAGCACACCATCC                   |
| 3            | Forward | TGGCACCCACTAACATTTCC       | Forward | TCTTCTTCTCCAAGCCTCC                  |
| 3            | Reverse | CACACAACACACAAAAGAATGG     | Reverse | CACACAACACACAAAAGAATGG               |
| 4            | Forward | GGCCAGGCCTTTGCATTTTG       | Forward | GGCCAGGCCTTTGCATTTTG                 |
| 4            | Reverse | ACTCAGCACACACCTTGGAG       | Reverse | ACTCAGCACACACCTTGGAG                 |
| 5            | Forward | CCTGACTGAGGGTGTCAAGG       | Forward | CCTGACTGAGGGTGTCAAGG                 |
| 5            | Reverse | GAAGTTAATCTTGGAGTGTATTTGC  | Reverse | GGCACTTACGTTGTCTCTCC                 |
| 6            | Forward | CCTGACTGAGGGTGTCAAGG       | Forward | GCTGAGTTGAATGTGGATGG                 |
| 6            | Reverse | GAAGTTAATCTTGGAGTGTATTTGC  | Reverse | GAAGTTAATCTTGGAGTGTATTTGC            |
