# Supplementary material for: Identical Substitutions in Magnesium Chelatase Paralogs Result in Chlorophyll-Deficient Soybean Mutants
Source: PubMed Central journal article supplement (PMC4291463; doi:10.1534/g3.114.015255), 2014-12-01
Supplement: supp_g3.114.015255_TableS4.pdf [file supp_g3.114.015255_TableS4.pdf]

**Table S4 PCR Primers used to amplify Glyma15g08680 for CD-5.**

| PCR Reaction | Type    | Primer Pair First Reaction | Type    | Primer Pair Second Reaction (Nested) |
|--------------|---------|----------------------------|---------|--------------------------------------|
| 1            | Forward | CGGAGACTGGTAAATGTGAGC      | Forward | CGGAGACTGGTAAATGTGAGC                |
| 1            | Reverse | CAGCACACCTCCAAAACAAG       | Reverse | CAGCACACCTCCAAAACAAG                 |
| 2            | Forward | GGCTAGGCCTTTGTGTTTGA       | Forward | GGCTAGGCCTTTGTGTTTGA                 |
| 2            | Reverse | AACGGGAAATGCTGATTGAG       | Reverse | AACGGGAAATGCTGATTGAG                 |
| 3            | Forward | GCTGCTGGATAGGTTTGAA        | Forward | GCTGCTGGATAGGTTTGAA                  |
| 3            | Reverse | AACGGGAAATGCTGATTGAG       | Reverse | AACGGGAAATGCTGATTGAG                 |
| 4            | Forward | TCAATTGCGGTTCTTCCTTC       | Forward | ACGTCAGCTGCTATGAATGG                 |
| 4            | Reverse | TGGCCTCTGGCTTTCTTTAG       | Reverse | GTAGCTCCAATGGCAAATC                  |
| 5            | Forward | TCAATTGCGGTTCTTCCTTC       | Forward | TCAATTGCGGTTCTTCCTTC                 |
| 5            | Reverse | TGGCCTCTGGCTTTCTTTAG       | Reverse | TGGCCTCTGGCTTTCTTTAG                 |
