# Supplementary material for: Identical Substitutions in Magnesium Chelatase Paralogs Result in Chlorophyll-Deficient Soybean Mutants
Source: PubMed Central journal article supplement (PMC4291463; doi:10.1534/g3.114.015255), 2014-12-01
Supplement: supp_g3.114.015255_TableS5.pdf [file supp_g3.114.015255_TableS5.pdf]

**Table S5 Twenty-two genes models present in the fine-mapped interval Gm13: 33,141,206..33,306,556**

| Gene          | Location                 | Gene Annotation                                                                      |
|---------------|--------------------------|--------------------------------------------------------------------------------------|
| Glyma13g30550 | Gm13: 33141000..33143927 | Transferase family                                                                   |
| Glyma13g30560 | Gm13: 33144571..33147208 | Magnesium chelatase, subunit ChII                                                    |
| Glyma13g30575 | Gm13: 33147978..33151645 | Peroxisomal NUDIX hydrolase                                                          |
| Glyma13g30590 | Gm13: 33154582..33158861 | Family not named                                                                     |
| Glyma13g30600 | Gm13: 33163957..33165210 | Zinc finger, C3HC4 type (RING finger)                                                |
| Glyma13g30610 | Gm13: 33171016..33182189 | ATP-Dependent RNA Helicase                                                           |
| Glyma13g30620 | Gm13: 33183067..33188556 | Glutamate-gated kainate-type ion channel receptor subunit GluR5 and related subunits |
| Glyma13g30625 | Gm13: 33193010..33194243 | There are no functional annotations for this locus                                   |
| Glyma13g30630 | Gm13: 33193058..33193890 | There are no functional annotations for this locus                                   |
| Glyma13g30650 | Gm13: 33194700..33195205 | There are no functional annotations for this locus                                   |
| Glyma13g30640 | Gm13: 33194530..33201169 | Glutamate-gated kainate-type ion channel receptor subunit GluR5 and related subunits |
| Glyma13g30660 | Gm13: 33204225..33209549 | Glutamate-gated kainate-type ion channel receptor subunit GluR5 and related subunits |
| Glyma13g30670 | Gm13: 33210247..33214795 | D-Tyr-tRNA (Tyr) deacylase                                                           |
| Glyma13g30680 | Gm13: 33221124..33226612 | GDSL-like Lipase/Acylhydrolase                                                       |
| Glyma13g30690 | Gm13: 33231142..33237718 | GDSL-like Lipase/Acylhydrolase                                                       |
| Glyma13g30710 | Gm13: 33243653..33244787 | Regulation of transcription, DNA-dependent                                           |
| Glyma13g30720 | Gm13: 33247690..33248688 | Regulation of transcription, DNA-dependent                                           |
| Glyma13g30730 | Gm13: 33259622..33263250 | Pterin carbinolamine dehydratase PCBD/dimerization cofactor of HNF1                  |
| Glyma13g30740 | Gm13: 33263320..33264787 | Protein of unknown function, DUF599                                                  |
| Glyma13g30750 | Gm13: 33280224..33286703 | Auxin response factor                                                                |
| Glyma13g30760 | Gm13: 33291706..33297139 | Mlo family                                                                           |
| Glyma13g30770 | Gm13: 33302261..33303185 | Glutaredoxin                                                                         |
