# Supplementary material for: Identical Substitutions in Magnesium Chelatase Paralogs Result in Chlorophyll-Deficient Soybean Mutants
Source: PubMed Central journal article supplement (PMC4291463; doi:10.1534/g3.114.015255), 2014-12-01
Supplement: supp_g3.114.015255_TableS6.pdf [file supp_g3.114.015255_TableS6.pdf]

**Table S6 Soybean CHLI Genes and Expression Data.** Normalized soybean expression data showing that Glyma13g30560 and Glyma15g08680 share similar expression patterns, however Glyma13g30560 showing approximately twice the expression level in leaf tissues. Source: Severin, AJ, Woody JL, Bolon YT, Joseph B, Diers BW, et al. (2010) RNA-Seq Atlas of Glycine max: a guide to the soybean transcriptome. BMC Plant Biol 10:160.

| Gene          | Young leaf | Flower | One cm pod | Pod shell 10DAF | Pod shell 14DAF | Seed 10DAF | Seed 14DAF | Seed 21DAF | Seed 25DAF | Seed 28DAF | Seed 35DAF | Seed 42DAF | Root | Nodule |
|---------------|------------|--------|------------|-----------------|-----------------|------------|------------|------------|------------|------------|------------|------------|------|--------|
| Glyma13g30560 | 106        | 16     | 38         | 41              | 33              | 2          | 3          | 6          | 8          | 6          | 8          | 3          | 1    | 1      |
| Glyma15g08680 | 51         | 8      | 16         | 18              | 17              | 2          | 5          | 7          | 9          | 5          | 7          | 3          | 1    | 1      |
| Glyma07g32550 | 2          | 3      | 2          | 1               | 1               | 1          | 1          | 1          | 1          | 0          | 0          | 0          | 2    | 1      |
| Glyma13g24050 | 0          | 2      | 0          | 0               | 1               | 1          | 2          | 0          | 1          | 0          | 1          | 0          | 1    | 1      |
